# Supplementary material
Source: HighWire-hosted journal article supplement (http://err.ersjournals.com/highwire/filestream/13301/field_highwire_adjunct_files/0/Supplementary_material.pdf)
Supplement: Supplementary_material.pdf [file Supplementary_material.pdf]

Table S1.  
Molecular mechanism of cellular transition

| MECHANISM                | CELLULAR EFFECT                                                                                                                                                                                          | MODEL                                 | REFERENCE                                                                                                                                 |
|--------------------------|----------------------------------------------------------------------------------------------------------------------------------------------------------------------------------------------------------|---------------------------------------|-------------------------------------------------------------------------------------------------------------------------------------------|
| KL-6 (inhibition of HGF) | differentiation of fibroblast stimulation of collagen III and V                                                                                                                                          | human embryonic lung fibroblasts      | KL-6 regulated the expression of HGF, collagen and myofibroblast differentiation.                                                         |
| LPA1                     | differentiation of blood mesenchymal stem cells                                                                                                                                                          | bleomycin                             | Lysophosphatidic acid accelerates lung fibrosis by inducing differentiation of mesenchymal stem cells into myofibroblasts.                |
| IGF-1                    | differentiation of fibroblasts                                                                                                                                                                           | bleomycin                             | Role of IGF-1 pathway in lung fibroblast activation.                                                                                      |
| microRNA-21              | EMT                                                                                                                                                                                                      | bleomycin/<br>murine epithelial cells | The increase of microRNA-21 during lung fibrosis and its contribution to epithelial-mesenchymal transition in pulmonary epithelial cells. |
| NOX-4                    | differentiation of fibroblasts                                                                                                                                                                           | bleomycin/<br>human lung fibroblasts  | An Inhibitor of NADPH Oxidase-4 Attenuates Established Pulmonary Fibrosis in a Rodent Disease Model.                                      |
| LPA2                     | differentiation of fibroblasts and apoptosis of alveolar and bronchial epithelial cells                                                                                                                  | bleomycin/<br>human lung fibroblasts  | Lysophosphatidic Acid Receptor-2 Deficiency Confers Protection against Bleomycin-Induced Lung Injury and Fibrosis in Mice.                |
| Oncostatin M             | gel contraction, chemotaxis, and $\alpha$ -SMA expression of fibroblasts                                                                                                                                 | human lung fibroblasts                | Oncostatin M modulates fibroblast function via signal transducers and activators of transcription proteins-3.                             |
| Adrenomedullin           | attenuates expression of SMA, collagen-1, fibronectin, gel contractility in pre-differentiated myofibroblasts. No effect on initial differentiation of quiescent fibroblasts in response to TGF- $\beta$ | bleomycin/<br>human lung fibroblast   | Regulation of myofibroblast differentiation and bleomycin-induced pulmonary fibrosis by adrenomedullin.                                   |

|                                                                                |                                                                                                                                                          |                                                                                                                                              |                                                                                                                                                              |
|--------------------------------------------------------------------------------|----------------------------------------------------------------------------------------------------------------------------------------------------------|----------------------------------------------------------------------------------------------------------------------------------------------|--------------------------------------------------------------------------------------------------------------------------------------------------------------|
| mDia2                                                                          | differentiation of fibroblasts                                                                                                                           | human lung fibroblasts                                                                                                                       | Control of myofibroblast differentiation by microtubule dynamics through a regulated localization of mDia2.                                                  |
| 25-hydroxycholesterol/NF- $\kappa$ B                                           | differentiation of fibroblasts                                                                                                                           | human fetal lung fibroblasts                                                                                                                 | 25-hydroxycholesterol promotes fibroblast-mediated tissue remodeling through NF- $\kappa$ B dependent pathway.                                               |
| focal adhesion kinase-related nonkinase (FRNK)                                 | reduces fibroblast migration and differentiation                                                                                                         | mouse model                                                                                                                                  | FAK-related nonkinase is a multifunctional negative regulator of pulmonary fibrosis.                                                                         |
| PGE2                                                                           | reversal of myofibroblasts differentiation, collagen I expression and $\alpha$ -SMA expression                                                           | Fetal and adult lung fibroblasts induced to differentiate into myofibroblasts by transforming growth factor (TGF)- $\beta$ 1 or endothelin-1 | Reversal of myofibroblast differentiation by prostaglandin E(2).                                                                                             |
| Mitogen-activated protein kinase-activated protein kinase-2 (MAPKAPK2, or MK2) | myofibroblast differentiation, the secretion of collagen type I, fibronectin, and the activation of focal adhesion kinase                                | bleomycin                                                                                                                                    | Peptide-mediated inhibition of mitogen-activated protein kinase-2 ameliorates bleomycin-induced pulmonary fibrosis.                                          |
| miR-199a-5p/caveolin 1                                                         | increased in myofibroblasts from injured mouse lungs and fibroblastic foci, induces fibroblasts proliferation, migration, invasion, and differentiation  | murine lung fibroblast                                                                                                                       | miR-199a-5p Is upregulated during fibrogenic response to tissue injury and mediates TGF $\beta$ -induced lung fibroblast activation by targeting caveolin-1. |
| miR-145                                                                        | miR-145 deficiency diminishes TGF- $\beta$ 1 induced $\alpha$ -SMA expression. miR-145(-/-) mice are protected from bleomycin-induced pulmonary fibrosis | miR-145(-/-) mice /murine lung fibroblasts                                                                                                   | miR-145 regulates myofibroblast differentiation and lung fibrosis.                                                                                           |
| Rho/Rho kinase (Rho/ROCK)                                                      | myofibroblasts survival                                                                                                                                  | bleomycin/human lung fibroblasts                                                                                                             | Inhibition of mechanosensitive signaling in myofibroblasts ameliorates experimental pulmonary fibrosis.                                                      |

|                                                    |                                                                                       |                                                                                          |                                                                                                                                                                                |
|----------------------------------------------------|---------------------------------------------------------------------------------------|------------------------------------------------------------------------------------------|--------------------------------------------------------------------------------------------------------------------------------------------------------------------------------|
| TGF beta/smad2                                     | pleural mesothelial cell differentiation into myofibroblasts                          | Human pleural mesothelial cells                                                          | Pleural mesothelial cell transformation into myofibroblasts and haptotactic migration in response to TGF- $\beta$ 1 in vitro                                                   |
| PI3K p110 $\gamma$                                 | fibroblasts proliferation rate and $\alpha$ -SMA expression                           | IPF fibroblasts                                                                          | PI3K p110 $\gamma$ overexpression in idiopathic pulmonary fibrosis lung tissue and fibroblast cells: in vitro effects of its inhibition.                                       |
| Glycogen synthase kinase-3 (GSK-3)                 | stimulates TGF- $\beta$ 1-induced myofibroblast differentiation of fibroblasts        | primary human lung fibroblasts                                                           | Glycogen synthase kinase-3 (GSK-3) regulates TGF- $\beta$ 1-induced differentiation of pulmonary fibroblasts.                                                                  |
| HIF1 $\alpha$ , LDH5, lactic acid                  | fibroblast differentiation (TGF dependent)                                            | human lung fibroblasts                                                                   | Lactic acid is elevated in idiopathic pulmonary fibrosis and induces myofibroblast differentiation via pH-dependent activation of transforming growth factor- $\beta$ .        |
| hedgehog pathway                                   | fibroblasts differentiation (TGF dependent)                                           | normal and IPF fibroblasts                                                               | The hedgehog system machinery controls transforming growth factor- $\beta$ -dependent myofibroblastic differentiation in humans: involvement in idiopathic pulmonary fibrosis. |
| ET-1/FAK axis                                      | myofibroblasts formation                                                              | bleomycin/murine lung fibroblasts                                                        | Adenoviral gene transfer of endothelin-1 in the lung induces pulmonary fibrosis through the activation of focal adhesion kinase.                                               |
| neuronal Wiskott-Aldrich syndrome protein (N-WASP) | maturation of $\alpha$ -SMA-containing cytoplasmic filaments                          | primary human lung fibroblasts                                                           | Neuronal Wiskott-Aldrich syndrome protein (N-WASP) is critical for formation of $\alpha$ -smooth muscle actin filaments during myofibroblast differentiation.                  |
| nuclear factor erythroid 2-related factor 2 (Nrf2) | dedifferentiation of myofibroblasts                                                   | normal and IPF fibroblasts                                                               | Nuclear factor erythroid 2-related factor 2 nuclear translocation induces myofibroblastic dedifferentiation in idiopathic pulmonary fibrosis.                                  |
| Galectin-3                                         | EMT and fibroblasts differentiation                                                   | galectin-3 <sup>-/-</sup> mice/ murine Primary Lung Fibroblasts and Primary Type II AECs | Regulation of transforming growth factor- $\beta$ 1-driven lung fibrosis by galectin-3.                                                                                        |
| CCR2 ligand chemokine                              | fibrocyte proliferation, differentiation into myofibroblasts and chemotactic response | human and murine fibrocyte isolation                                                     | Chemokine (C-C motif) ligand 2 mediates direct and indirect fibrotic responses in human and murine cultured fibrocytes.                                                        |

|                                                                                |                                                                                                                                          |                                                                                                           |                                                                                                                                                         |
|--------------------------------------------------------------------------------|------------------------------------------------------------------------------------------------------------------------------------------|-----------------------------------------------------------------------------------------------------------|---------------------------------------------------------------------------------------------------------------------------------------------------------|
| Notch                                                                          | EMT                                                                                                                                      | rat alveolar epithelial cells                                                                             | Notch induces myofibroblast differentiation of alveolar epithelial cells via transforming growth factor- $\beta$ -Smad3 pathway.                        |
| TGF- $\beta$ 1 and CTGF                                                        | up-regulation of TGF- $\beta$ 1 and CTGF in pulmonary microvascular endothelial cells induces differentiation of co-cultured fibroblasts | co-culture system with rat PMVECs and fibroblasts                                                         | Pulmonary microvascular endothelial cells from bleomycin-induced rats promote the transformation and collagen synthesis of fibroblasts.                 |
| PDE4B                                                                          | TGF- $\beta$ induced fibroblasts (PDE4B knockdown) differentiation into myofibroblasts                                                   | mRNA silencing and a knockdown of the expressed PDE4 of primary normal human lung fibroblast              | The differential impact of PDE4 subtypes in human lung fibroblasts on cytokine-induced proliferation and myofibroblast conversion.                      |
| MeCP2                                                                          | myofibroblast differentiation                                                                                                            | MeCP2 gene expression by siRNA and MeCP2 deficiency in lung fibroblasts isolated from MeCP2 knockout mice | Essential role of MeCP2 in the regulation of myofibroblast differentiation during pulmonary fibrosis.                                                   |
| Wnt-inducible signaling protein 1 (wisp-1)/hyaluran                            | EMT                                                                                                                                      | primary murine AEC2                                                                                       | Mechanical stretch induces epithelial-mesenchymal transition in alveolar epithelia via hyaluronan activation of innate immunity.                        |
| Peroxisome proliferator-activated receptor- $\gamma$ (PPAR- $\gamma$ ) ligands | inhibits TGF $\beta$ -mediated differentiation of human lung fibroblasts                                                                 | human lung fibroblasts                                                                                    | PPARgamma agonists inhibit TGF-beta induced pulmonary myofibroblast differentiation and collagen production: implications for therapy of lung fibrosis. |
| TLR9                                                                           | increased in fibroblasts by IL-4 and IL-13, promotes differentiation of myofibroblasts                                                   | normal human and IPF fibroblasts                                                                          | TLR9 is expressed in idiopathic interstitial pneumonia and its activation promotes in vitro myofibroblast differentiation.                              |
| Serum Amyloid P                                                                | M2 macrophage differentiation of monocyte                                                                                                | IPF patients                                                                                              | TGF-beta driven lung fibrosis is macrophage dependent and blocked by Serum amyloid P.                                                                   |

|               |                                                                                                                                                                                                      |                                             |                                                                                                                                                                                                         |
|---------------|------------------------------------------------------------------------------------------------------------------------------------------------------------------------------------------------------|---------------------------------------------|---------------------------------------------------------------------------------------------------------------------------------------------------------------------------------------------------------|
| IL-15         | myofibroblast differentiation                                                                                                                                                                        | human fetal lung fibroblasts                | Interleukin-15 attenuates transforming growth factor- $\beta$ 1-induced myofibroblast differentiation in human fetal lung fibroblasts.                                                                  |
| NOX-4         | $\alpha$ -SMA expression by controlling activation of Smad2/3 and PDGF-induced fibroblast migration.                                                                                                 | normal human and IPF fibroblasts            | NOX4/NADPH oxidase expression is increased in pulmonary fibroblasts from patients with idiopathic pulmonary fibrosis and mediates TGF $\beta$ 1-induced fibroblast differentiation into myofibroblasts. |
| THY-1         | Thy-1 expression prevents fibroblast contraction-induced, integrin $\alpha$ (v) $\beta$ 5-dependent latent TGF- $\beta$ 1 activation and TGF- $\beta$ 1-dependent lung myofibroblast differentiation | RFL-6 rat lung fibroblasts                  | Thy-1-integrin $\alpha$ v $\beta$ 5 interactions inhibit lung fibroblast contraction-induced latent transforming growth factor- $\beta$ 1 activation and myofibroblast differentiation.                 |
| FXa           | myofibroblast differentiation via TGF- $\beta$ 1 activation                                                                                                                                          | primary human lung fibroblasts              | Increased local expression of coagulation factor X contributes to the fibrotic response in human and murine lung injury.                                                                                |
| ET-1          | ET-1 and TGF- $\beta$ 1 independently promote fibroblast resistance to apoptosis via p38 MAPK and PI3K/AKT                                                                                           | Normal primary human fetal lung fibroblasts | Endothelin-1 and transforming growth factor- $\beta$ 1 independently induce fibroblast resistance to apoptosis via AKT activation.                                                                      |
| Unc119        | myofibroblast differentiation by activating Fyn and the p38 MAPK pathway                                                                                                                             | human fetal lung fibroblast                 | Unc119 regulates myofibroblast differentiation through the activation of Fyn and the p38 MAPK pathway.                                                                                                  |
| FIZZ1         | induction of myofibroblast differentiation and prolonged survival of myofibroblasts                                                                                                                  | mouse lung fibroblasts                      | Antiapoptotic effect of found in inflammatory zone (FIZZ)1 on mouse lung fibroblasts.                                                                                                                   |
| TGF $\beta$ 1 | EMT                                                                                                                                                                                                  | bronchial epithelial cells                  | Detection of epithelial to mesenchymal transition in airways of a bleomycin induced pulmonary fibrosis model derived from an $\alpha$ -smooth muscle actin-Cre transgenic mouse.                        |

|             |                                                                                                                    |                                                          |                                                                                                                                                                              |
|-------------|--------------------------------------------------------------------------------------------------------------------|----------------------------------------------------------|------------------------------------------------------------------------------------------------------------------------------------------------------------------------------|
| MK2         | reduced $\alpha$ -SMA expression                                                                                   | mouse embryonic fibroblasts (MEF) from MK2 knockout mice | Smooth muscle alpha-actin expression and myofibroblast differentiation by TGFbeta are dependent upon MK2.                                                                    |
| FAK/AKT     | anoikis resistance of fibroblasts                                                                                  | Normal primary human fetal lung fibroblasts              | Combinatorial activation of FAK and AKT by transforming growth factor-beta1 confers an anoikis-resistant phenotype to myofibroblasts.                                        |
| FGF-1       | apoptosis in fibroblasts and myofibroblasts and inhibits the effect of TGF-beta1 on myofibroblast differentiation. | Primary human lung fibroblasts                           | Acidic fibroblast growth factor decreases alpha-smooth muscle actin expression and induces apoptosis in human normal lung fibroblasts.                                       |
| PTEN        | inhibits myofibroblast differentiation                                                                             | embryonic mouse fibroblasts                              | Negative regulation of myofibroblast differentiation by PTEN (Phosphatase and Tensin Homolog Deleted on chromosome 10).                                                      |
| H2O2        | death signal for lung epithelial cells produced by myofibroblasts                                                  | IPF fibroblasts and small airway epithelial cells        | Hydrogen peroxide is a diffusible paracrine signal for the induction of epithelial cell death by activated myofibroblasts.                                                   |
| CCR-2       | decreases $\alpha$ -SMA expression induced by TGF-beta1                                                            | CCR2 knockout (ko) mice fibroblasts                      | CC-chemokine receptor 2 required for bleomycin-induced pulmonary fibrosis.                                                                                                   |
| Wt1         | MMT                                                                                                                | PMCs were obtained from IPF lung explants                | Wilms' tumor 1 (Wt1) regulates pleural mesothelial cell plasticity and transition into myofibroblasts in idiopathic pulmonary fibrosis.                                      |
| Snail       | EMT                                                                                                                | murine bronchial epithelial cells                        | Transforming growth factor- $\beta$ 1 induces bronchial epithelial cells to mesenchymal transition by activating the Snail pathway and promotes airway remodeling in asthma. |
| microRNA-21 | EMT                                                                                                                | lung alveolar type II cells                              | The increase of microRNA-21 during lung fibrosis and its contribution to epithelial-mesenchymal transition in pulmonary epithelial cells.                                    |
| Thrombin    | EMT                                                                                                                | human A549 alveolar epithelial cells                     | Thrombin induces epithelial-mesenchymal transition via PAR-1, PKC, and ERK1/2 pathways in A549 cells.                                                                        |

|                        |                                                                                                  |                                                                      |                                                                                                                                                          |
|------------------------|--------------------------------------------------------------------------------------------------|----------------------------------------------------------------------|----------------------------------------------------------------------------------------------------------------------------------------------------------|
| IL-22                  | reduces epithelial to mesenchymal transition (EMT)                                               | alveolar epithelial cell line A549 cells                             | Interleukin-22 inhibits bleomycin-induced pulmonary fibrosis.                                                                                            |
| miR-200                | inhibits transforming growth factor- $\beta$ 1-induced epithelial-mesenchymal transition of AECs | murine AEC                                                           | Participation of miR-200 in pulmonary fibrosis.                                                                                                          |
| S1P                    | EMT                                                                                              | human AEC                                                            | Sphingosine-1-phosphate is increased in patients with idiopathic pulmonary fibrosis and mediates epithelial to mesenchymal transition.                   |
| Cadherin-11            | EMT                                                                                              | human A549 alveolar epithelial cells                                 | Cadherin-11 contributes to pulmonary fibrosis: potential role in TGF- $\beta$ production and epithelial to mesenchymal transition.                       |
| c-Abl and PKC $\delta$ | endo-MT                                                                                          | Primary mouse pulmonary ECs                                          | Protein kinase C $\delta$ and c-Abl kinase are required for transforming growth factor $\beta$ induction of endothelial-mesenchymal transition in vitro. |
| FGF-1                  | reverse EMT through MAPK/ERK kinase pathway                                                      | A549 and RLE-6TN (human and rat) alveolar epithelial-like cell lines | FGF-1 reverts epithelial-mesenchymal transition induced by TGF- $\beta$ 1 through MAPK/ERK kinase pathway.                                               |
| Twist                  | EMT                                                                                              | murine lung epithelial cells                                         | Twist: a regulator of epithelial-mesenchymal transition in lung fibrosis.                                                                                |
| ROS/HIF                | EMT                                                                                              | primary human, rat, and mouse AEC                                    | Hypoxia-induced alveolar epithelial-mesenchymal transition requires mitochondrial ROS and hypoxia-inducible factor 1.                                    |
| HGF/Smad 7             | inhibits EMT                                                                                     | primary murine alveolar epithelial cells                             | Hepatocyte growth factor inhibits epithelial to myofibroblast transition in lung cells via Smad7.                                                        |
| NO                     | inhibits EMT                                                                                     | primary human alveolar epithelial cells                              | Nitric oxide attenuates epithelial-mesenchymal transition in alveolar epithelial cells.                                                                  |
| IGFBP-5                | fibroblasts differentiation, EMT and mononuclear cell infiltration                               | primary fibroblasts and alveolar epithelial cells                    | Insulin-like growth factor-binding protein-5 induces pulmonary fibrosis and triggers mononuclear cellular infiltration.                                  |

|       |             |                |                                                                                                                               |
|-------|-------------|----------------|-------------------------------------------------------------------------------------------------------------------------------|
| LRP-6 | pericyte MT | mice pericytes | LRP-6 is a coreceptor for multiple fibrogenic signaling pathways in pericytes and myofibroblasts that are inhibited by DKK-1. |
|-------|-------------|----------------|-------------------------------------------------------------------------------------------------------------------------------|
